# Supplementary material
Source: publisher figshare collection journal article supplement (https://frontiersin.figshare.com/ndownloader/files/15200726)
Supplement: Supplementary file 1 [file 15200726]

Supplementary Material

# Appendix A: Query Strings for Retrieval of Longitudinal Studies of Early Development

| criterion | Scopus | Web of Science |
| --- | --- | --- |
| #1 | Used as inclusion criterion intellectual disability or a clinical condition with intellectual disability as phenotype | |
|  | TITLE-ABS-KEY ( ("intellectual*” W/3 (“disab*” or “impair*” or “handicap*” or “subnormal*” or “deficien*”)) OR (“mental*” W/3 (“disab*” or “impair*” or “handicap*” or “subnormal*” or “deficien*” or “retard*”)) OR (“learning” W/3 (“disab*” or “impair*” or “difficult*” or “deficien*”)) OR “moron*” OR “imbecile*” OR “feeble?minded” OR “subnormal*” OR “retard*” OR (“Smith?Magenis” or “Rett*” or “Lesch?Nyhan” or “Prader?Willi” or “Angelman” or “fragile?X” or “Cri?du?chat” or “Cornelia?de?Lange” or “de?Lange” or “Rubinstein?Taybi” or “velocardiofacial” or “DiGeorge” or (Down* W/2 syndrome)) OR "developmental* delay*" OR “special?needs” OR “global developmental delay” OR “special educational needs” OR “social communication disorder”) | TS = ( ("intellectual*” NEAR/3 (“disab*” or “impair*” or “handicap*” or “subnormal*” or “deficien*”)) OR (“mental*” NEAR/3 (“disab*” or “impair*” or “handicap*” or “subnormal*” or “deficien*” or “retard*”)) OR (“learning” NEAR/3 (“disab*” or “impair*” or “difficult*” or “deficien*”)) OR “moron*” OR “imbecile*” OR “feeble?minded” OR “subnormal*” OR “retard*” OR (“Smith?Magenis” or “Rett*” or “Lesch?Nyhan” or “Prader?Willi” or “Angelman” or “fragile?X” or “Cri?du?chat” or “Cornelia?de?Lange” or “de?Lange” or “Rubinstein?Taybi” or “velocardiofacial” or “DiGeorge” or (Down* NEAR/2 syndrome)) OR "developmental* delay*" OR “special?needs” OR “global developmental delay” OR “special educational needs” OR “social communication disorder”) |
| AND #2 | Aimed to quantify non-experimental change in dependent variable or associations between independent and dependent variables on at least two time points | |
|  | TITLE-ABS ( longitudinal* OR "follow*-up" OR wave OR "repeat* measure*" OR prospective OR course) | TS = ( longitudinal* OR "follow*-up" OR wave OR "repeat* measure*" OR prospective OR course) |
| AND #3 | Conducted the first measurement wave before end of age 7 for all children | |
|  | TITLE-ABS-KEY ( infan* OR baby OR babies OR toddler* OR preschool* OR "young child*" OR kindergarten OR “early childhood” OR “early development” OR “rising 5s” OR “pre-k*” OR “nursery” OR “early learner*” OR “child care” OR “playgroup”) | TS = ( infan* OR baby OR babies OR toddler* OR preschool* OR "young child*" OR kindergarten OR “early childhood” OR “early development” OR “rising 5s” OR “pre-k*” OR “nursery” OR “early learner*” OR “child care” OR “playgroup”) |
| AND #4 | Appeared as articles, books, chapters, or reports | |
|  | DOCTYPE ( ar OR ip OR bk OR ch OR rp ) | DOCUMENT TYPES: (Article OR Book OR Book Chapter) |
| AND #5 | Appeared in a journal within the domains of psychology or social sciences or in a journal in the field of intellectual disability | |
|  | SUBJAREA ( psyc OR soci ) OR SRCTITLE ( "intellectual disab*" OR "developmental disab*" OR "mental retardation" ) | WC = ( Psychology OR Rehabilitation OR Social Sciences) OR SO = ( "intellectual disab*" OR "developmental disab*" OR "mental retardation" ) |
| AND #6 | Were published before 2018 |  |
|  | PUBYEAR < 2018 | Timespan=1900-2017 |

# Appendix B: Deselected terms for mapping longitudinal studies and citing studies

| Exclusion criteria: | Term referring to  1. the specific selection criteria for this review paper  (longitudinal research, young children, intellectual disability)  2. study methods  3. trivial terms (statistical terms, publication type, country of study, etc.) |
| --- | --- |
| *k* = 101 longitudinal studies, machine reading, ≥ 5 times occurrence | |
| Deselected terms by criteria 1, 2, 3 | Addition, average, birth, case, child age, cohort, delay, developmental disability, developmental level, difficulty, domain, early childhood, effect, evidence, hypothesis, importance, infant, influence, intellectual disability, number, preschool child, present study, rate, rating, role, significant predictor, syndrome infant, time point, trajectory, type, use, variance, year period |
| *k* = 3,491 citing papers, machine reading, ≥ 50 times occurrence | |
| Deselected terms  by criteria 2, 3 | Approach, article, basis, benefit, case, cause, challenge, chapter, comparison group, concept, concern, contrast, control, control group, correlation, chronological age, emergence, example, experience, dimension, direction, feature, field, focus, frequency, future research, group difference, high level, higher level, hypothesis, i e, impact, inclusion, interview, issue, lack, literature, longitudinal study, mean age, month, opportunity, paper, person, perspective, predictor, prevalence, process, researcher, recommendation, review, score, significant difference, subject, survey, task, test, total, quality, questionnaire, understanding, variable, variance, variety, week, year old child |

# Appendix C: Eligible Longitudinal Studies of Early Development of Children with Intellectual Disability

Adamson, L.B., Bakeman, R., Deckner, D.F., Romski, M. (2009). Joint engagement and the emergence of language in children with autism and down syndrome, *J Autism Dev Disord* 39:1, doi: 10.1007/s10803-008-0601-7

Adlof, S.M., Klusek, J., Shinkareva, S.V., Robinson, M.L., Roberts, J.E. (2015). Phonological awareness and reading in boys with fragile X syndrome, *J Child Psychol Psych* 56:1, doi: 10.1111/jcpp.12267

Anders, T, Iosif, A.M., Schwictenberg, A.J., Tang, K., Goodlin-Jones, B. (2012). Sleep and daytime functioning: a short-term longitudinal study of three preschool-age comparison groups, *Am J Intellect Dev Disabil* 117:4,doi: 10.1352/1944-7558-117.4.275

Azad, G., Blacher, J, Macoulides, G.A. (2013). Mothers of children with developmental disabilities: stress in early and middle childhood, *Res Dev Disabil* 34:10, doi: 10.1016/j.ridd.2013.07.009

Azad, G., Blacher, J., Marcoulides, G. (2014). Longitudinal models of socio-economic status: impact on positive parenting behaviors, *Int J Behav Dev*, 38:6, doi: 10.1177/0165025414532172

Bailey Jr, D.B., Hatton, D.D., Skinner, M. (1998). Early developmental trajectories of males with Fragile X syndrome, *Am J Intellect Dev Disabil* 103:1, doi: 10.1352/0895-8017(1998)103<0029:EDTOMW>2.0.CO;2

Bailey Jr, D.B., Hatton, D.D., Skinner, M., Mesibov, G. (2001). Autistic behaviour, FMR1 protein, and developmental trajectories in young males with Fragile X syndrome, *J Autism Dev Disord* 31: 2, doi: 10.1023/A:1010747131386

Beckman, P.J., Kohl, F.L. (1987). Interactions of pre-schoolers with and without handicaps in integrated and segregated settings: a longitudinal study, *Ment Retard* 25:1, p.5-11

Bernheimer, L.P., Keogh, B.K. (1988). Stability of cognitive performance of children with developmental delays, *Am J Intellect Dev Disabil* 92:6, p.539-542

Bernheimer, L.P., Keogh, B.K., Guthrie, D. (2006). Young children with developmental delays as young adults: predicting developmental and personal-social outcomes, *Am J Intellect Dev Disabil* 111:4, doi: 10.1352/0895-8017(2006)111[263:YCWDDA]2.0.CO;2

Berkovits, L.D., Baker, B.L. (2014). Emotion dysregulation and social competence: stability, change and predictive power, *J Intellect Disabil Res* 58:8, doi: 10.1111/jir.12088

Blacher, J., Baker, B.L., Kaladjian, A. (2013). Syndrome specificity and mother-child interactions: examining positive and negative parenting across contexts and time, *J Autism Dev Disord* 43:4, doi: 10.1007/s10803-012-1605-x

Blacher, J., Begum, G.F., Marcoulides, G.A., Baker, B.L. (2013). Longitudinal perspectives of child positive impact on families: relationship to disability and culture, *Am J Intellect Dev Disabil* 118:2, doi: 10.1352/1944-7558-118.2.141

Booth-LaForce, C., Kelly, J.F. (2004). Childcare patterns and issues for families of preschool children with disabilities, *Infants Young Child* 17:1, doi: 10.1097/00001163-200401000-00004

Brady, N., Warren, S.F., Fleming, K., Keller, J., Sterling, A. (2014). Effect of sustained maternal responsivity on later vocabulary development in children with Fragile X syndrome, *J Speech Lang Hear Res* 57:1, doi: 10.1044/1092-4388(2013/12-0341)

Carr, J. (1988). Six weeks to twenty-one years old: a longitudinal study of children with Down’s Syndrome and their families: third Jack Tizard memorial lecture, *J Child Psychol Psychiatry* 29:4, doi: 10.1111/j.1469-7610.1988.tb00734.x

Carr, J. (1992). Longitudinal research in Down-Syndrome, *Intv Rev Res Ment Retard* 18, doi: 10.1016/s0074-7750(08)60120-2

Carr, J. (2012). Six weeks to 45 years: a longitudinal study of a population with Down Syndrome, *J App Res Intellect Disabil* 25:5, doi: 10.1111/j.1468-3148.2011.00676.x

Cárdenas, K., Rodríguez, C., Palacios, P. (2014). First symbols in a girl with Down syndrome: a longitudinal study from 12 to 18 months, *Infant Beh Dev* 37:3, doi: 10.1016/j.infbeh.2014.06.003

Clare, L., Garnier, H., Gallimore, R. (1998). Parents’ developmental expectations and child characteristics: longitudinal study of children with developmental delays and their families, *Am J Intellect Dev Disabil* 103:2, doi: 10.1352/0895-8017(1998)103<0117:PDEACC>2.0.CO;2

Cicchetti, D., Sroufe, L.A. (1976). The relationship between affective and cognitive development in Down’s Syndrome infants, *Child Dev* 47:4, doi: 10.1111/j.1467-8624.1976.tb02271.x

Ciciolla, L., Gerstein, E.D., Crnic, K.A. (2014). Reciprocity among maternal distress, child behavior, and parenting: transactional processes in early childhood risk, J Clin Child Adolesc Psychol 43:5, doi: 10.1080/15374416.2013.812038

Couzens, D., Haynes, M., Cuskelly, M. (2012). Individual and environmental characteristics associated with cognitive development in Down Syndrome: a longitudinal study, *J App Res Intellect Disabil* 25:5, doi: 10.1111/j.1468-3148.2011.00673.x

Diamond, K.E., LeFurgy, W.G. (1992). Relations between mothers’ expectations and the performance of their infants who have developmental handicaps, *Am J Intellect Dev Disabil* 97:1, p.11-20

Emerson, E., Giallo, R. (2014). The wellbeing of siblings of children with disabilities, *Res Dev Disabil* 35:9, doi: 10.1016/j.ridd.2014.05.001

Fenning, R.M., Baker, J.K., Baker, B.L., Crnic, K.A. (2014). Parent-child interaction over time in families of young children with borderline intellectual functioning, *J Fam Psychol* 28:3, doi: 10.1037/a0036537

Gallimore, R., Keogh, B.K., Bernheimer, L.P. (1999). The nature and long-term implications of early developmental delays: a summary of evidence from two longitudinal studies, *Intv Rev Res Ment Retard* 22, doi: 10.1016/s0074-7750(08)60132-9

Ganiban, J., Barnett, D., Cicchetti, D. (2000). Negative reactivity and attachment: Down syndrome’s contribution to the attachment-temperament debate, *Dev Psychopathol* 12:1, doi: 10.1017/S0954579400001012

Gerstein, E.D., Crnic, K.A., Blacher, J., Baker, B.L. (2009). Resilience and the course of daily parenting stress in families of young children with intellectual disabilities, *J Intellect Disabil Res* 53:12, doi: 10.1111/j.1365-2788.2009.01220.x

Gilmore, L., Cuskelly, M. (2009). A longitudinal study of motivation and competence in children with Down syndrome: early childhood to early adolescence, *J Intellect Disabil Res* 53:5, doi: 10.1111/j.1365-2788.2009.01166.x

Gilmore, L., Cuskelly, M. (2012). Parenting satisfaction and self-efficacy: a longitudinal study of mothers of children with Down syndrome, *J Fam Stud* 18:1, doi: 10.5172/jfs.2012.18.1.28

Glidden, L.M., Grein, K.A., Ludwig, J.A. (2014). The Down Syndrome advantage: it depends on what and when you measure, *Ajidd-Am J Intellect Dev Disabil* 119:5, doi: 10.1352/1944-7558-119.5.389

Gowen, J.W., Johnsonmartin, N., Goldman, B.D., Hussey, B. (1992). Object play and exploration in children with and without disabilities – a longitudinal-study, *Am J Intellect Dev Disabil* 97:1, 21-38

Green, S., Baker, B. (2011). Parents’ emotion expression as a predictor of child’s social competence: children with or without intellectual disability, *J Intellect Disabil Res* 55:3, doi:10.1111/j.1365-2788.2010.01363.x

Gunn, P., Berry, P., Andrews, R.J. (1981). The affective response of Down’s syndrome infants to a repeated event, *Child Dev* 52:2, doi: 10.1111/j.1467-8624.1981.tb03110.x

Guralnick, M.J., Hammond, M.A., Connor, R.T. (2003). Subtypes of non-social play: comparisons between young children with and without developmental delays, *Am J Intellect Dev Disabil* 108:5, doi: 10.1352/0895-8017(2003)108<347:SONPCB>2.0.CO;2

Guralnick, M.J., Hammond, M.A., Connor, R.T., Neville, B. (2006). Stability, change, and correlates of the peer relationships of young children with mid developmental delays, *Child Dev* 77:2, doi: 10.1111/j.1467-8624.2006.00872.x

Guralnick, M.J., Neville, B., Hammond, M.A., Connor, R.T. (2008). Mothers’ social communicative adjustments to young children with mild developmental delays, *Am J Ment Retard* 113:1, doi: 10.1352/0895-8017(2008)113[1:MSCATY]2.0.CO;2

Guralnick, M.J., Neville, B., Hammond, M.A., Connor, R.T. (2007). The friendships of young children with developmental delays: a longitudinal analysis, *J App Dev Psychol* 28:1, doi: 10.1016/j.appdev.2006.10.004

Guralnick, M.J., Hammond, M.A., Neville, B., Connor, R.T. (2008). The relationship between sources and functions of social support and dimensions of child-and parent-related stress, *J Intellect Disabil Res* 52:12, doi: 10.1111/j.1365-2788.2008.01073.x

Guralnick, M.J., Weinhouse, E. (1984). Peer-related social interactions of developmentally delayed young children: development and characteristics, *Dev Psychol* 20:5, doi: 10.1037/0012-1649.20.5.815

Hames, A. (2008). Siblings’ understanding of learning disability: a longitudinal study, *J App Res Intellect Disabil* 21:6, doi: 10.1111/j.1468-3148.2007.00419.x

Hepburn, S., Philofsky, A., Fidler, D.J., Rogers, S. (2008). Autism symptoms in toddlers with down syndrome: a descriptive study, *J App Res Intellect Disabil* 21:1, doi: 10.1111/j.1468-3148.2007.00368.x

Hepper, P.G., Shahidullah, S. (1992). Habituation in normal and Down’s syndrome foetuses, *Q J Exp Psychol B* 44:3-4, doi: 10.1080/02724999208250617

Hasan, P.J., Messer, D.J. (1997). Stability or instability in early cognitive abilities in children with Down’s syndrome?, *Brit J Dev Disabil* 43:2, p.93-107

Hatton, C., Emerson, E., Graham, H., Blacher, J., Llewellyn, G. (2010). Changes in family composition and marital status in families with a young child with cognitive delay, *J App Res Intellect Disabil* 23:1, doi: 10.1111/j.1468-3148.2009.00543.x

Hauser-Cram, P., Warfield, M.E., Shonkoff, J.P., Krauss, M.W., Sayer, A., Upshur, C.C. (2001). Children with disabilities: a longitudinal study of child development and parent well-being, *Monogr Soc Res Child Dev* 66, 1-112

Hauser-Cram, P., Warfield, M.E., Shonkoff, J.P., Krauss, M.W., Upshur, C.C., Sayer, A. (1999). Family influences on adaptive development in young children with down syndrome, *Child Dev* 70:4, doi: 10.1111/1467-8624.00071

Kaat-van den Os, D.T., Volman, C., Jongmans, M., Lauteslager, P. (2017). Expressive vocabulary development in children with Down syndrome: a longitudinal study, *J Policy Pract Intellect Disabil* 14:4, doi: 10.1111/jppi.12212

Keltner, B.R., Wise, L.A., Taylor, G. (1999). Mothers with intellectual limitations and their 2-year-old children’s developmental outcomes, *J Intellect Disabil* 24:1, p. 45-57

Keogh, B.K., Berneimer, L.P., Guthrie, D. (1997). Stability and change over time in cognitive level of children with delays, *Am J Ment Retard* 101:1, p.365-373

Lalueza, J.L., Perinat, A. (1993). Development of shared meaning in play between adults and children with down syndrome, *Infanc Apprendiz* 17:67-68, doi: 10.1174/021037094321268903

Legerstee, M., Fisher, T. (2008). Coordinated attention, declarative and imperative pointing in infants with and without Down syndrome: sharing experiences with adults and peers, *First Lang* 28:3, doi: 10.1177/0142723708091045

Legerstee, M., Weintraub, J. (1997). The integration of person and object attention in infants with and without down syndrome, *Infant Beh Dev* 20:1, doi: 10.1016/S0163-6383(97)90062-X

Marchal, J.P., Maurice-Stam, H., Houtzager, B.A., Rutgers van Rozenburg-Marres, S.L., Oostom, K.J., Grootenhuis, M.A., van Trotsenburg, A.S.P. (2016). Growing up with Down syndrome: development from 6 months to 10.7 years, *Res Dev Disabil* 59, doi: 10.1016/j.ridd.2016.09.019

Marquis, W.A., Noroña, A.N., Baker, B.L. (2017). Developmental delay and emotion dysregulation: predicting parent-child conflict across early to middle childhood, *J Fam Psychol* 31:3, doi: 10.1037/fam0000267

Marschik, P.B., Sigafoos, J., Kaufmann, W.E., Wolin, T., Taliska, V.B., Bartl-Pokorny, K.D., Budimirovic, D.B., Vollman, R., Einspieler, C. (2012). Peculiarities in the gestural repertoire: an early marker for Rett syndrome? *Res Dev Disabil* 33:6, doi: 10.1016/j.ridd.2012.05.014

Mazzone, L., Vassena, L., Ruta, L., Mugno, D., Galesi, O., Fichera, M. (2012). Brief report: peculiar evolution of autistic behaviors in two unrelated children with brachidactyly-mental retardation syndrome, *J Autism Dev Disord* 42:10, doi: 10.1007/s10803-011-1432-5

McCardle, P., Wilson, B. (1993). Language and development in FG syndrome with callosal agenesis, *Clin Commun Disord* 26:2, doi: 10.1016/0021-9924(93)90002-R

McConkey, R., Martin, H., (1983). Mothers’ play with toys: a longitudinal study with Down’s syndrome infants, *Child Care Health Dev* 9:4, doi: 10.1111/j.1365-2214.1983.tb00318.x

McConkey, R., Martin, H. (1984). A longitudinal study of mothers’ speech to preverbal Down’s Syndrome infants, *First Lang* 5:13, doi: 10.1177/014272378400501303

McCormick, C., Hepburn, S., Young, G.S., Rogers, S.J. (2015). Senosry symptoms in children with autism spectrum disorder, other developmental disorders and typical development: a longitudinal study, *Autism* 20:5, doi: 10.1177/1362361315599755

Most, C.E., Fidler, D.J., Laforce-Booth, C., Kelly, J. (2006). Stress trajectories in mothers of young children with Down syndrome, *J Intellect Disabil Res* 50, doi: 10.1111/j.1365-2788.2006.00796

Mundy, P., Kasari, C., Sigman, M., Ruskin, E. (1995). Nonverbal-communication and early language-acquisition in children with Down-Syndrome and in normally developing-children, *J Speech Lang Hear Res* 38:1, doi: 10.1044/jshr.3801.157

Næss, K.A.B. (2016). Development of phonological awareness in Down syndrome: a meta-analysis and empirical study, *Dev Psychol* 52:2, doi: 10.1037/a0039840

Næss, K.A.B., Lervåg, A., Lyster, S.A.H., Hulme, C. (2015). Longitudinal relationships between language and verbal short-term memory skills in children with Down syndrome, *J Exp Child Psychol*, 135: doi: 10.1016/j.jecp.2015.02.004

Neece, C., Baker, B. (2008). Predicting maternal parenting stress in middle childhood: the roles of child intellectual status, behaviour problems and social skills, *J Intellect Disabil Res* 52, 1114-1128

Neece, C.L., Baker, B.L., Blacher, J., Crnic, K.A. (2011). Attention-deficit/hyperactivity disorder among children with and without intellectual disability: an examination across time, *J Intellect Disabil Res* 55:7, doi: 10.1111/j.1365-2788.2011.01416.x

Nes, R.B., Røysamb, E., Hauge, L.J., Kornstad, T., Landolt, M.A., Iregns, L.M., Eskedal, L.T., Kristensen, P., Vollrath, M.E. (2014). Adaptation to the birth of a child with a congenital anomaly: a prospective longitudinal study of maternal well-being and psychological distress, *Dev Psychol* 50:6, doi: 10.1037/a0035996

Norona, A.N., Baker, B.L. (2014). The transactional relationship between parenting and emotion regulation in children with or without developmental delays, *Res Dev Disabil* 35:12, doi: 10.1016/j.ridd.2014.07.048

Noroña, A.N., Tung, I., Lee, S.S., Blacher, J., Crnic, K.A., Baker, B.L. (2017). Developmental patterns of child emotion dysregulation as predicted by serotonin transporter genotype and parenting, *J Clin Child Adolesc Psychol*, doi: 10.1080/15374416.2017.1326120

Pimentel, J.S., Menéres, S. (2003). The development of children with Down syndrome: the influence of maternal adaptation, mother-child interaction and early forms of support, *Eur J Spec Needs Educ* 18:2, doi: 10.1080/0885625032000078998

Reed, R.B., Pueschel, S.M., Schnell, R.R., Cronk, C.E. (1980). Interrelationships of biological, environmental and competency variables in young children with down syndrome, *Appl Res Ment Retard* 1:3-4, doi: 10.1016/0270-3092(80)90002-8

Roberts, J.E., Hatton, D.D., Bailey Jr, D.B. (2001). Development and behaviour of male toddlers with Fragile X syndrome, *Early Interv Psychiatry* 24:3, doi: 10.1177/10538151010240030601

Rodriguez-Barrera, J.C., Chaves-Castano, L. (2017). What is the level of development expected for a child with Down syndrome in their first years of life? *Univ Psychol* 16:4, doi: 10.11144/Javeriana.upsy16-4.cnde

Rodríguez Blancas Y Herro, M.C. (2013). Learning difficulty in 10 years of monitoring in relation to prenatal and perinatal history of high-risk newborns, *Rev Mex Neuroci* 14:4, p.249-253

Richman, D.M., Lindauer, S.E. (2005). Longitudinal assessment of stereotypic proto-injurious, and self-injurious behavior exhibited by young children with developmental delays, *Am J Ment Retard* 110:6, doi: 10.1352/0895-8017(2005)110[439:LAOSPA]2.0.CO;2

Schuchardt, K., Piekny, J., Mähler, C. (2017). Development of executive functioning in preschoolers with developmental disabilities: ADHD symptoms, specific language impairment, and intellectual disabilities, *Kindh Entwickl* 26:1, doi: 10.1026/0942-5403/a000213

Schwichtenberg, A.J., Iosif, A.M., Goodlin-Jones, B., Tang, K.R., Anders, T. (2011). Daytime sleep patterns in preschool children with Autism, Developmental Delay, and typical development, *Ajidd-Am J Intellect* 116:2, doi: 10.1352/1944-7558-116.2.142

Shepperdson, B. (1995). Two longitudinal studies of the abilities of people with Down’s syndrome, *J Intellect Disabil Res* 39:5, doi: 10.1111/j.1365-2788.1995.tb00546.x

Sigafoos, J., Roberts-Pennell, D., Graves, D. (1999). Longitudinal assessment of play and adaptive behavior in young children with developmental disabilities, *Res Dev Disabil* 20:2, doi: 10.1016/S0891-4222(98)00038-9

Sigman, M., Ruskin, E., Arbelle, S., Corona, R., Dissanayke, C., Epinosa, M., Kim, N., López, A., Zierhut, C. (1999). Continuity and change in the social competence of children with autism, down syndrome, and developmental delays, *Monogr Soc Res Child Dev* 64:1, p.1-113

Smith, B.L., Stoel-Gammon, C. (1996). A quantitative analysis of reduplicated and variegated babbling in vocalizations by Down syndrome infants, *Clin Linguist Phon* 10:2, doi: 10.3109/02699209608985166

Steele, A., Scerif, G., Cornish, K., Karmiloff-Smith, A. (2013). Learning to read in Williams syndrome and Down syndrome: syndrome-specific precursors and developmental trajectories, *J Child Psychol Psych* 54:7, doi: 10.1111/jcpp.12070

Stiles, J., Sabbadini, L., Capirci, O., Volterra, V. (2000). Drawing abilities in Williams syndrome: a case study, *Dev Neuropsychol* 18:2, doi: 10.1207/S15326942DN1802_4

Stjames, P.J., Tagerflusberg, H. (1994). An observational study of humor in Autism and Down-syndrome, *J Autism Dev Disord* 24:5, p.603-617

Tonnsen, B.L., Malone, P.S., Hatton, D.D., Roberts, J.E. (2013). Early negative affect predicts anxiety, not Autism, in preschool boys with Fragile X syndrome, *J Abnorm Child Psychol* 41:2, doi: 10.1007/s10802-012-9671-2

Totsika, V., Hastings, R.P., Vagenas, D., Emerson, E. (2014). Parenting and the behavior problems of young children with an intellectual disability: concurrent and longitudinal relationships in a population-based study, *Am J Intellect Dev Disabil* 119:5, doi: 10.1352/1944-7558-119.5.422

Vandereet, J., Maes, B., Lembrechts, D., Zink, I. (2010). Predicting expressive vocabulary acquisition in children with intellectual disabilities: a 2-year longitudinal study, *J Speech Lang Hear Res* 53:6, doi: 10.1044/1092-4388(2010/09-0187)

Vandereet, J., Maes, B., Lembrechts, D., Zink, I. (2011). Expressive vocabulary acquisition in children with intellectual disability: speech or manual signs? *J Intellec Dev Disabil* 36:2, doi: 10.1080/13668250.2011.572547

Vandereet, J., Maes, B., Lembrechts, D., Zink, I. (2011). The role of gestures in the transition from one-to two-word speech in a variety of children with intellectual disabilities, *Int J Lang Commun Disord* 46:6, doi: 10.1111/j.1460-6984.2011.00050.x

Vaughn, B.E., Contreras, J., Seifer, R. (1994). Short-term longitudinal study of maternal ratings of temperament in samples of children with Down syndrome and children who are developing normally, *Am J Ment Retard* 98:5, p.607-618

Vaughn, S., Zaragoza, N., Hogan, A., Walker, J. (1993). A four-year longitudinal investigation of the social skills and behavior problems of students with learning disabilities, *J. Learn. Disabil* 26:6, p.404-412

Warfield, M.E., Krauss, M.W., Hauser-Cram, P., Upshur, C.C., Shonkoff, J.P. (1999). Adaptation during early childhood among mothers of children with disabilities, *J Dev Behav Pediatr* 20:1, doi: 10.1097/00004703-199902000-00002

Warren, S.F., Brady, N., Fleming, K.K., Hahn, L.J. (2017). The longitudinal effects of parenting on adaptive behavior in children with Fragile X syndrome, *J Autism Dev Disord* 47:3, doi: 10.1007/s10803-016-2999-7

Wehmeyer, M.L. (1991). Typical and atypical repetitive motor behaviors in young children at risk for severe mental retardation, *Am J Ment Retard* 96:1, p.53-62

Wishart, J.G. (1993). The development of learning difficulties in children with Down’s syndrome, *J Intellect Disabil Res* 37:4, doi: 10.1111/j.1365-2788.1993.tb00882.x

Yang, P., Lung, F.W., Jong, Y.J., Hsu, H.Y., Chen, C.C. (2010). Stability and change of cognitive attributes in children with uneven/delayed cognitive development from preschool through childhood, *Res Dev Disabil* 31:4, doi: 10.1016/j.ridd.2010.02.011

Zampini, L., D’Odorico, L. (2013). Vocabulary development in children with Down syndrome: longitudinal and cross-sectional data, *J Intellect Disabil Res* 38:4, doi: 10.3109/13668250.2013.828833

Zampini, L., Salvi, A., D’Odorico, L. (2015). Joint attention behaviours and vocabulary development in children with Down syndrome, *J Intellect Disabil Res* 59:10, doi: 10.1111/jir.12191

Zeedyk, S.M., Blacher, J. (2017). Longitudinal correlates of maternal depression among mothers of children with and without intellectual disability, *Ajidd-Am J Intellect* 122:5, doi: 10.1352/1944-7558-122.5.374
